# Supplementary material for: Age-related changes in the response of retinal structure, function and blood flow to pressure modification in rats
Source: PubMed Central journal article supplement (PMC5811482; doi:10.1038/s41598-018-21203-5), 2018-02-13
Supplement: 41598_2018_21203_MOESM1_ESM.pdf [file 41598_2018_21203_MOESM1_ESM.pdf]

**Title: Age-related changes in the response of retinal structure, function and blood flow to pressure modification in rats**

Authors: Da Zhao<sup>1</sup>, Christine TO Nguyen<sup>1</sup>, Zheng He<sup>1</sup>, Vickie HY Wong<sup>1</sup>, Anna van Koeeverden<sup>1</sup>, Algis J Vingrys<sup>1</sup>, Bang V Bui<sup>1</sup>

<sup>1</sup>Department of Optometry and Vision Sciences, University of Melbourne, Parkville, 3010, Victoria, Australia.

**Correspondence:** Bang V Bui

Department of Optometry and Vision Sciences, University of Melbourne, Parkville, 3010, Victoria, Australia.

Ph: +61 3 8344 7006

Email: [bvb@unimelb.edu.au](mailto:bvb@unimelb.edu.au)

## SUPPLEMENTARY MATERIAL

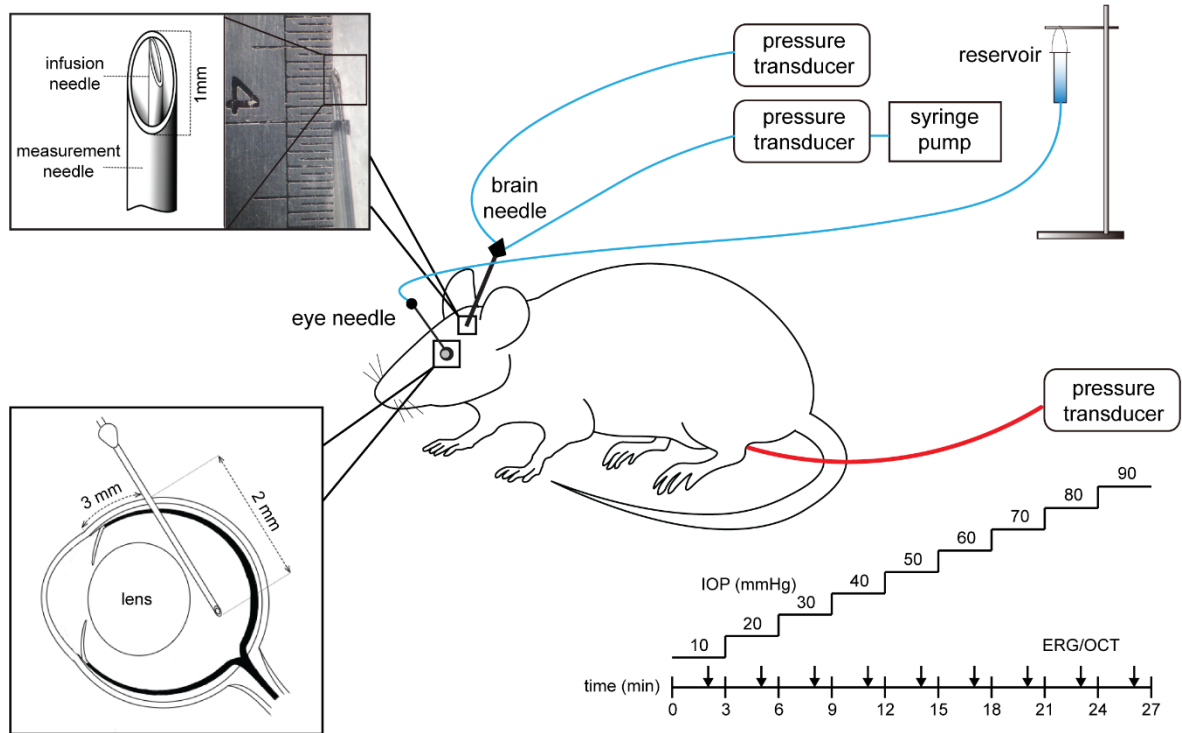

**Figure S1. ICP and IOP modification methodology.** ICP modification was achieved by a customized dual-lumen needle cannula placed in the lateral ventricle (upper left corner). A syringe pump was used to manipulate ICP. IOP elevation was achieved via a 27G needle cannula inserted into the vitreous chamber (lower left corner) attached to a saline reservoir (upper right corner), which was placed at pre-calibrated heights. BP was continuously monitored via a femoral artery cannula. Once ICP had stabilised for 20 minutes, IOP was increased from 10 to 90 mmHg in 10 mmHg steps each lasting 3 minutes. Two minutes after the onset of each IOP step, ERG or OCT was assayed.
